# Supplementary material for: Immunopathological properties of the Campylobacter jejuni flagellins and the adhesin CadF as assessed in a clinical murine infection model
Source: PubMed Central journal article supplement (PMC6525468; doi:10.1186/s13099-019-0306-9), 2019-05-17

**A**

# Apoptotic Cells (Casp3+) - COLON

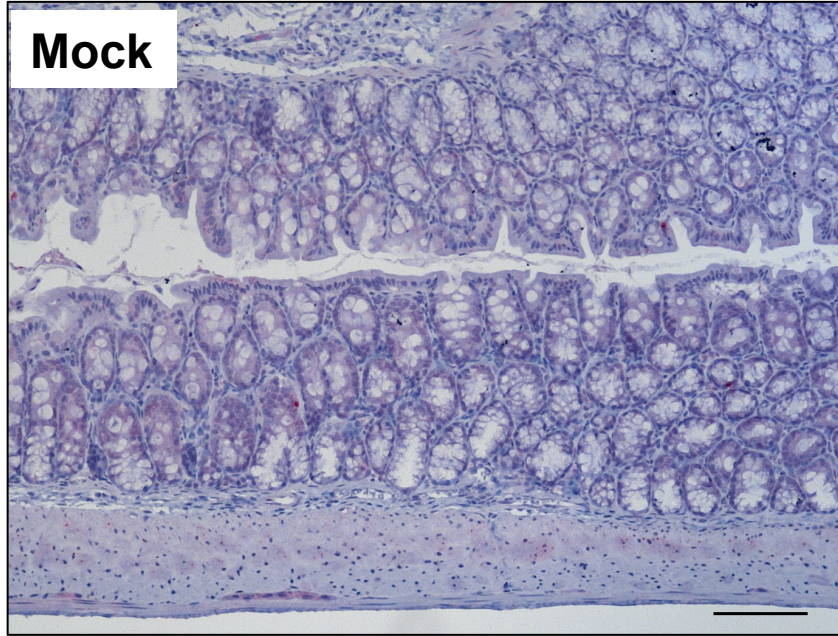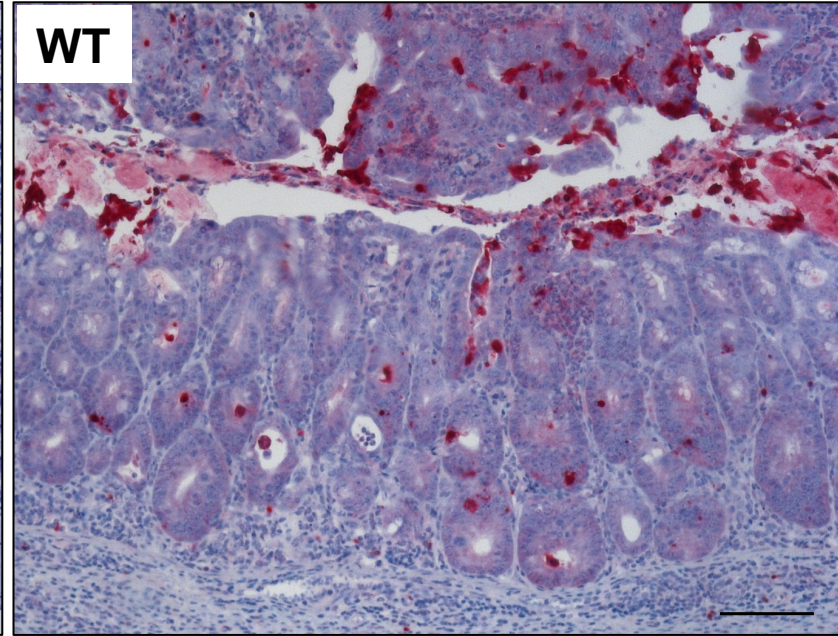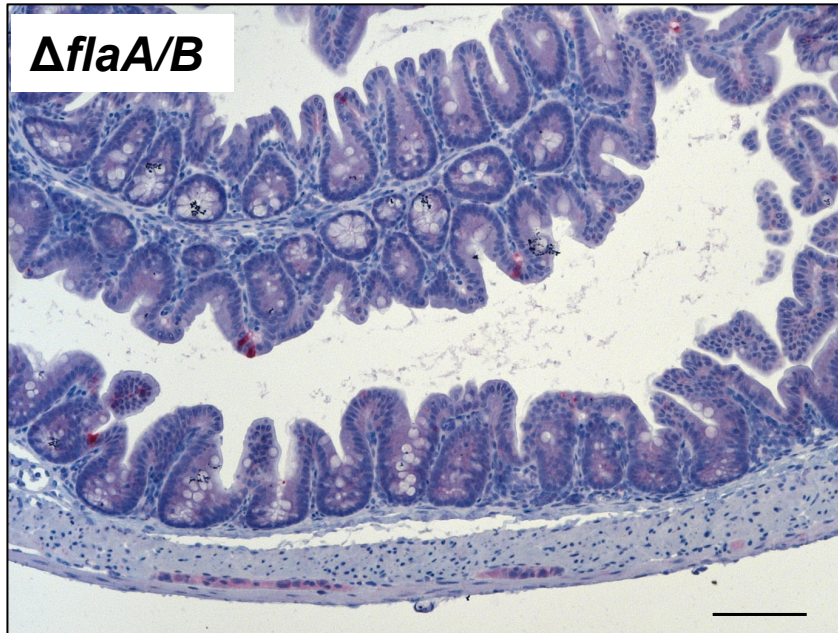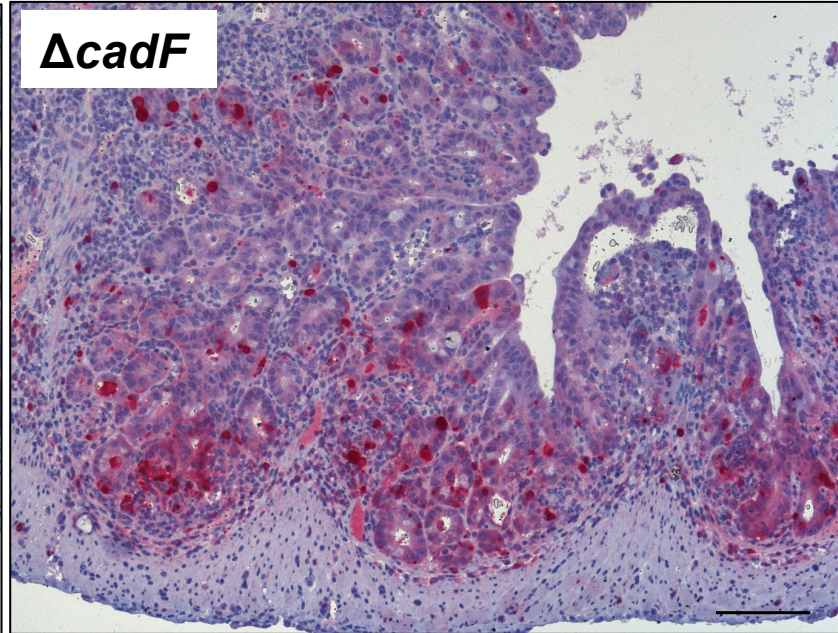

**B**

# Proliferating Cells (Ki67+) - COLON

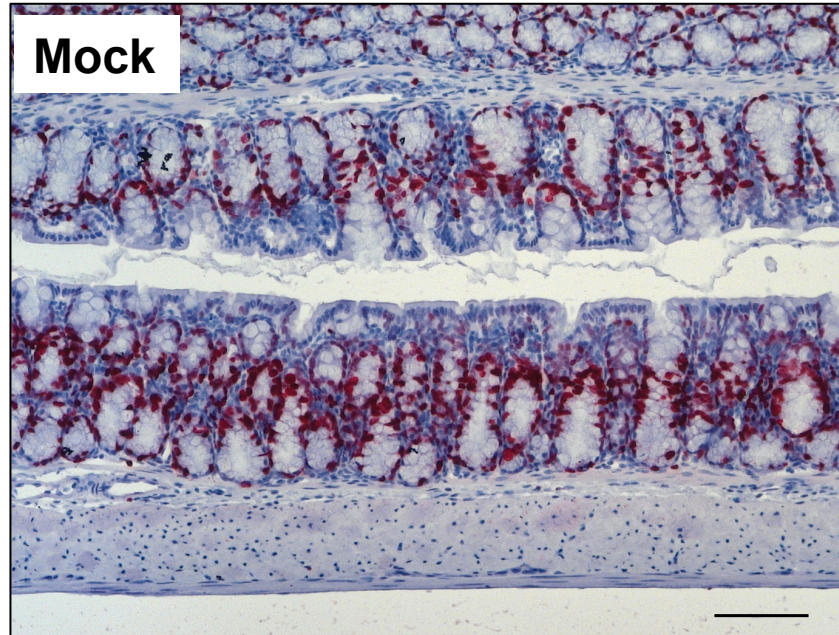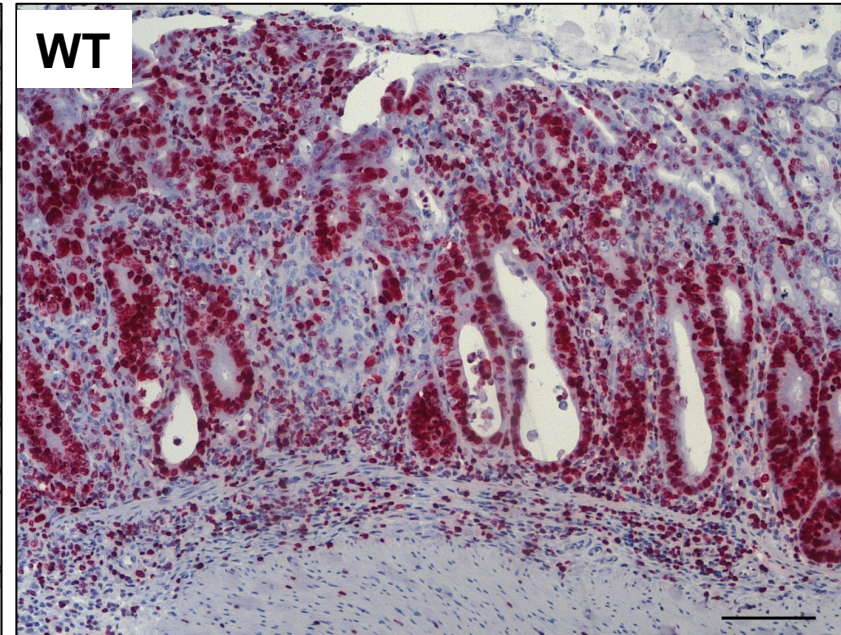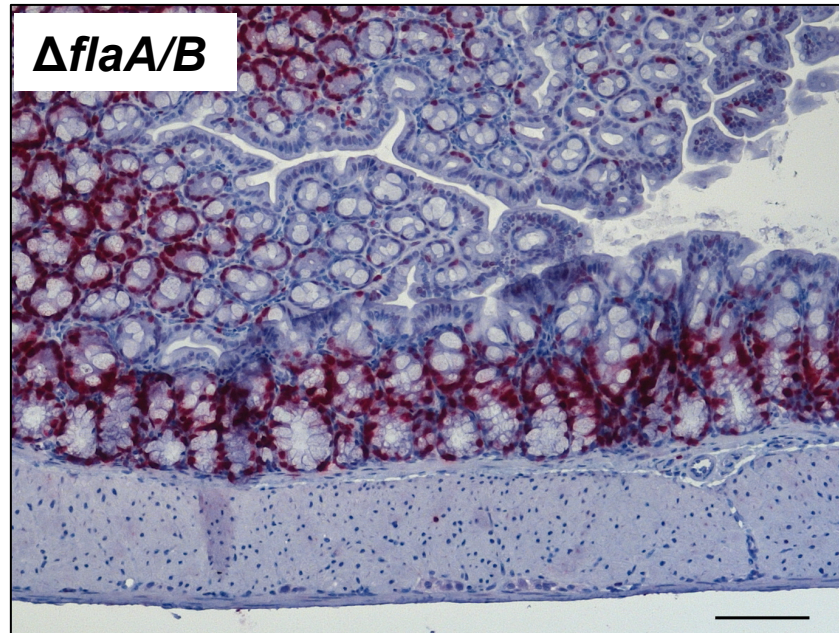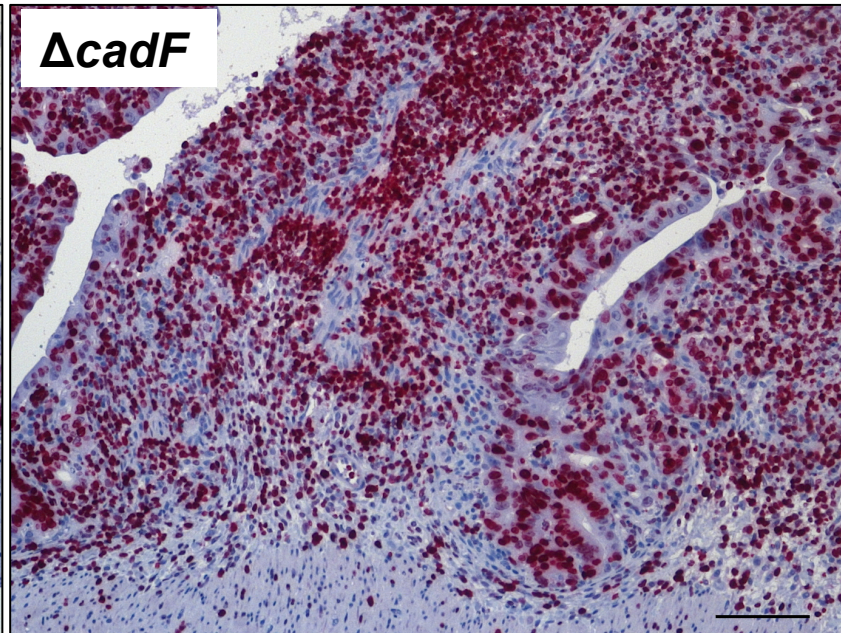

C

# Macrophages / Monocytes (F4/80+) - COLON

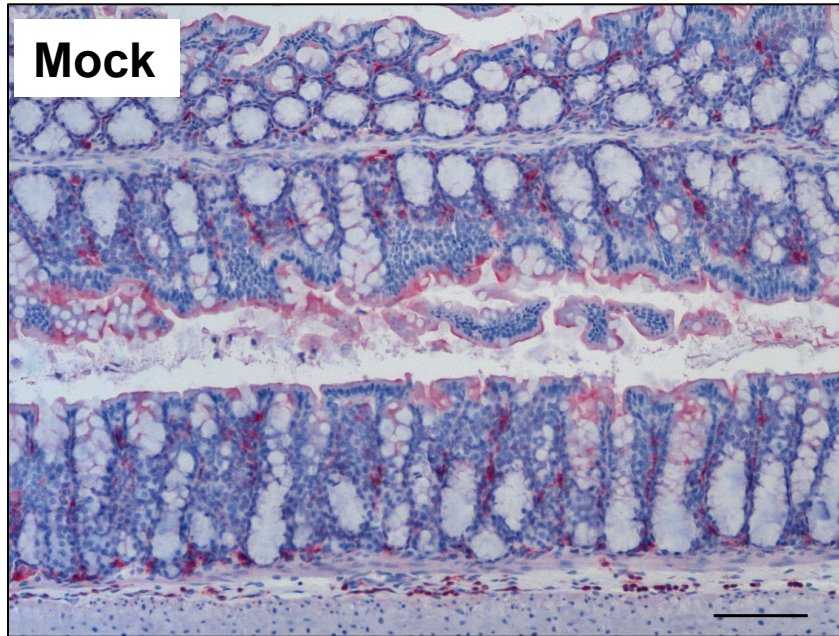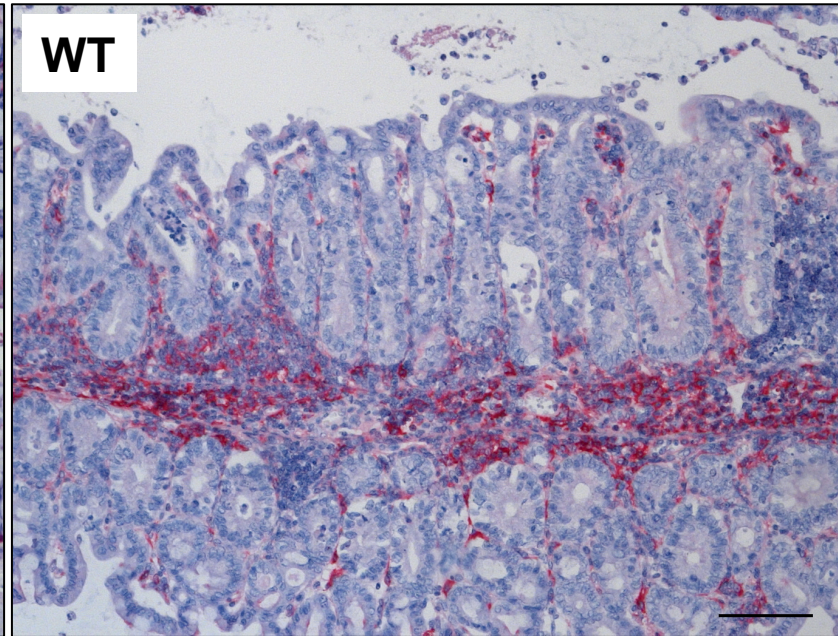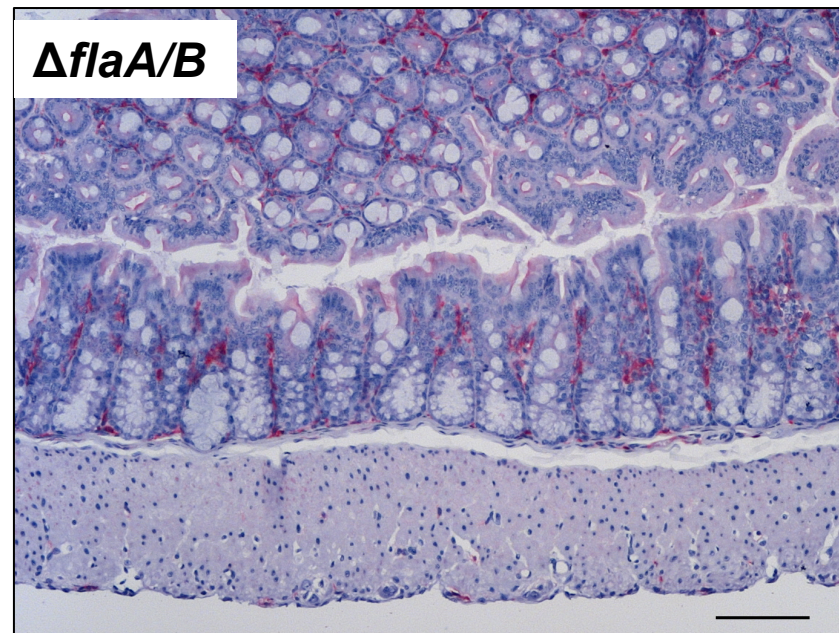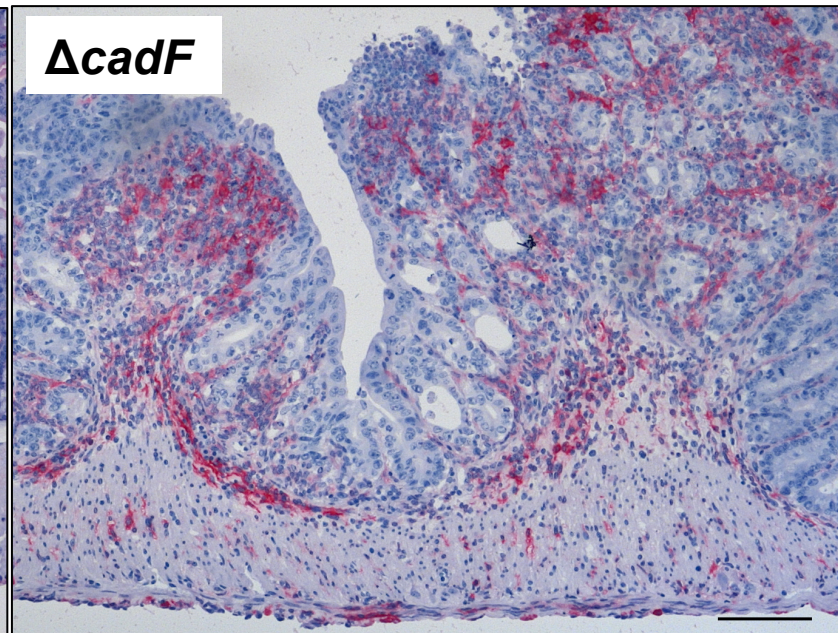

D

# T Lymphocytes (CD3+) - COLON

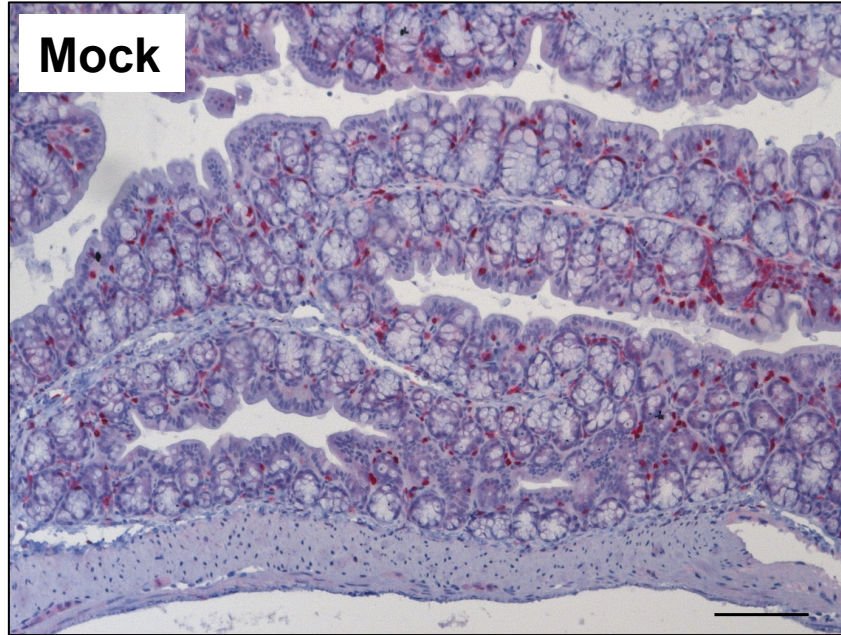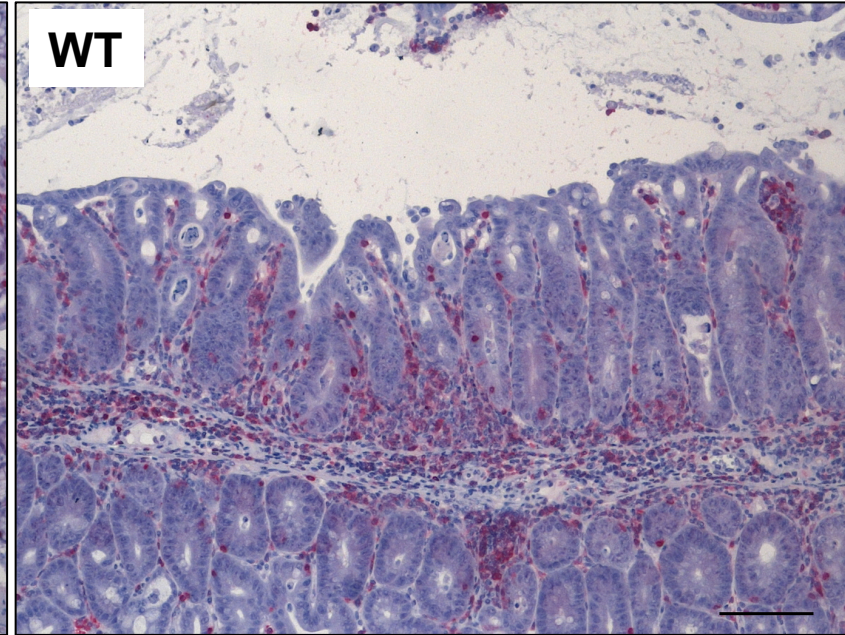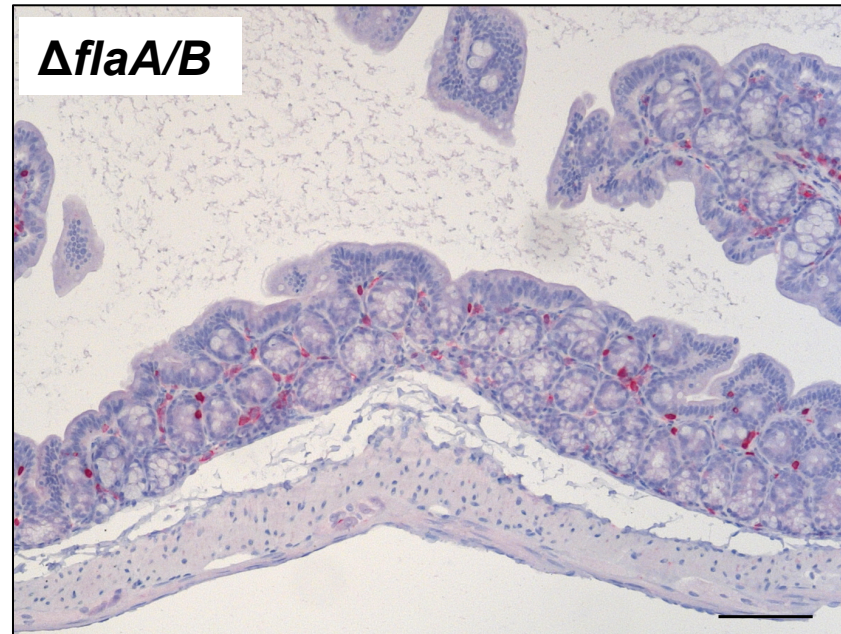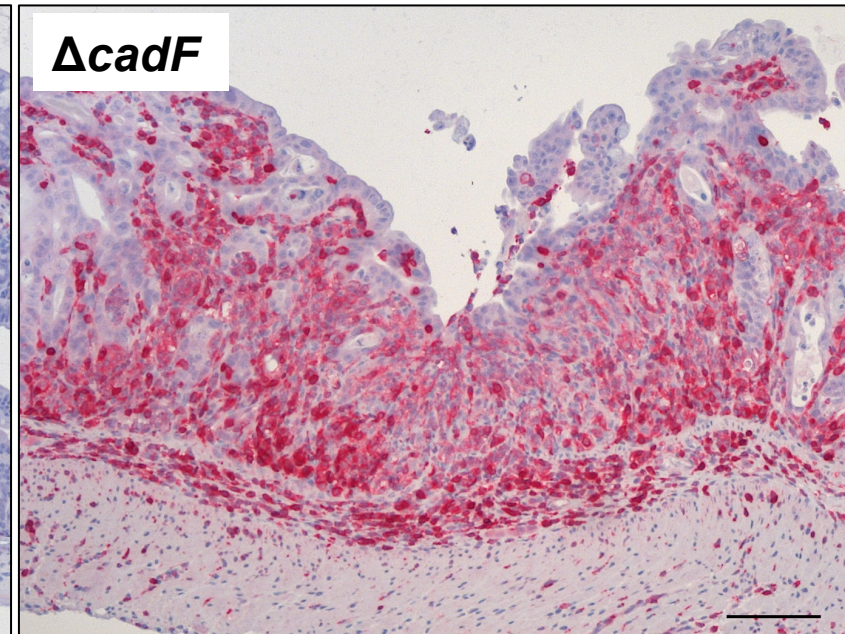

**E**

# B Lymphocytes (B220+) - COLON

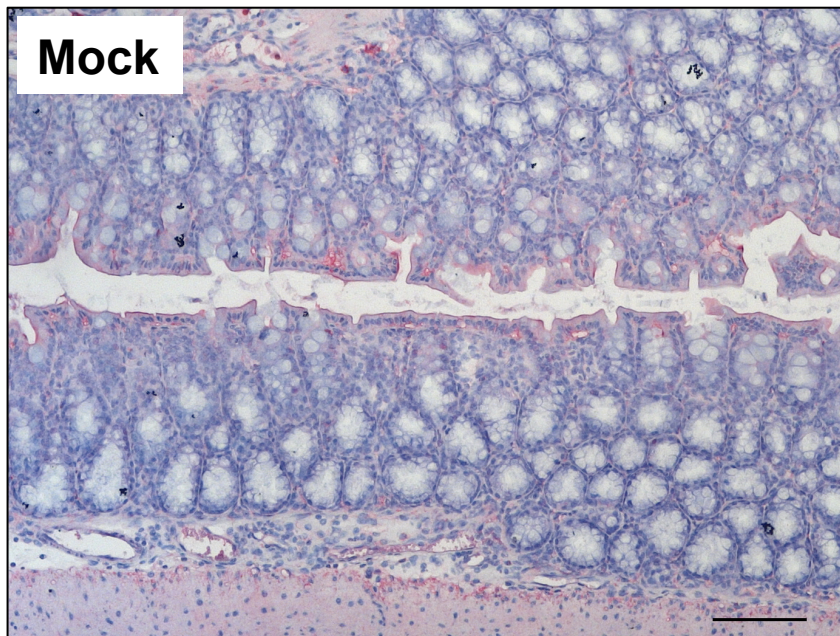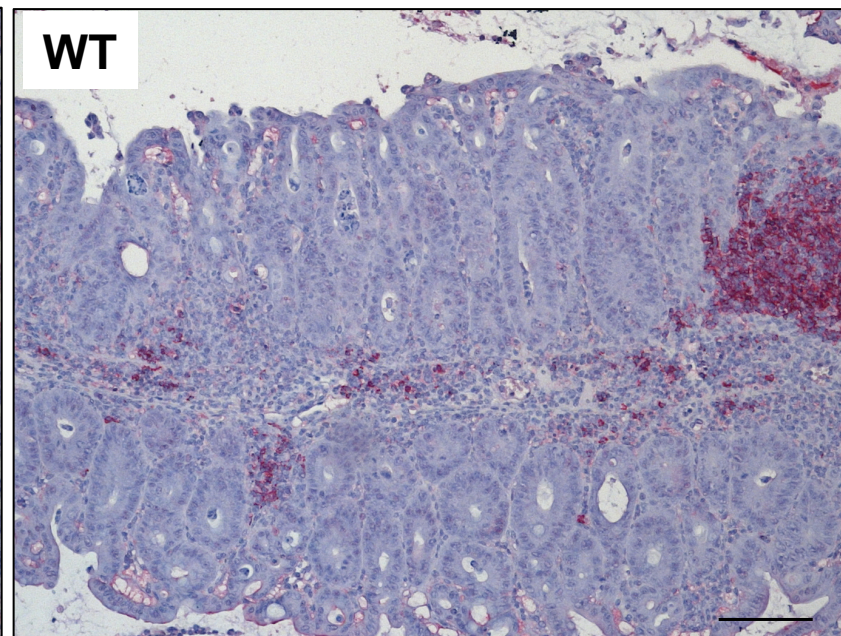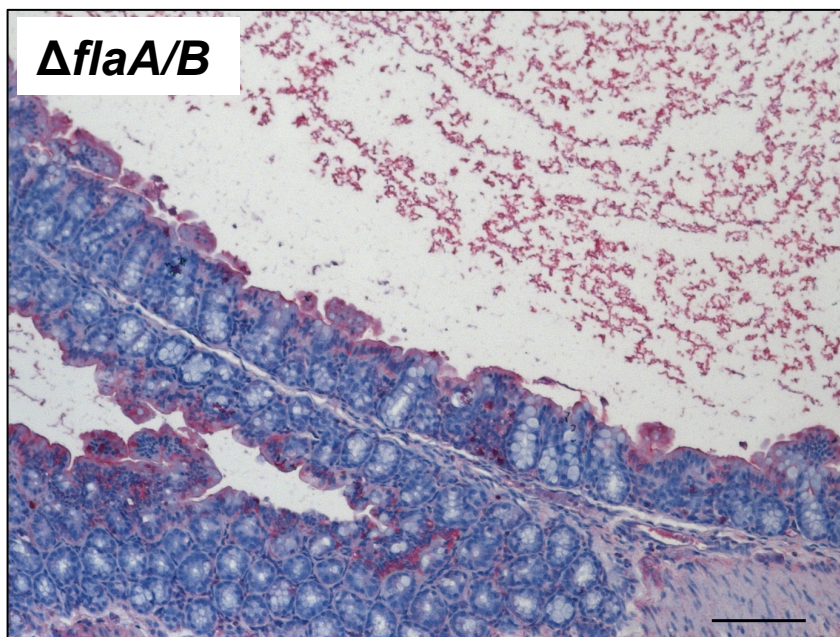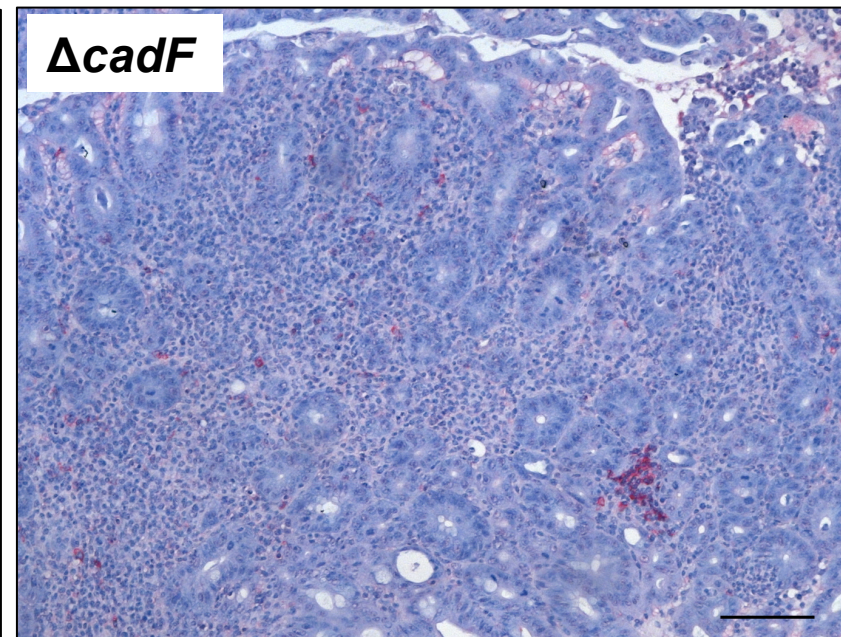

**F**

# T Lymphocytes (CD3+) - LIVER

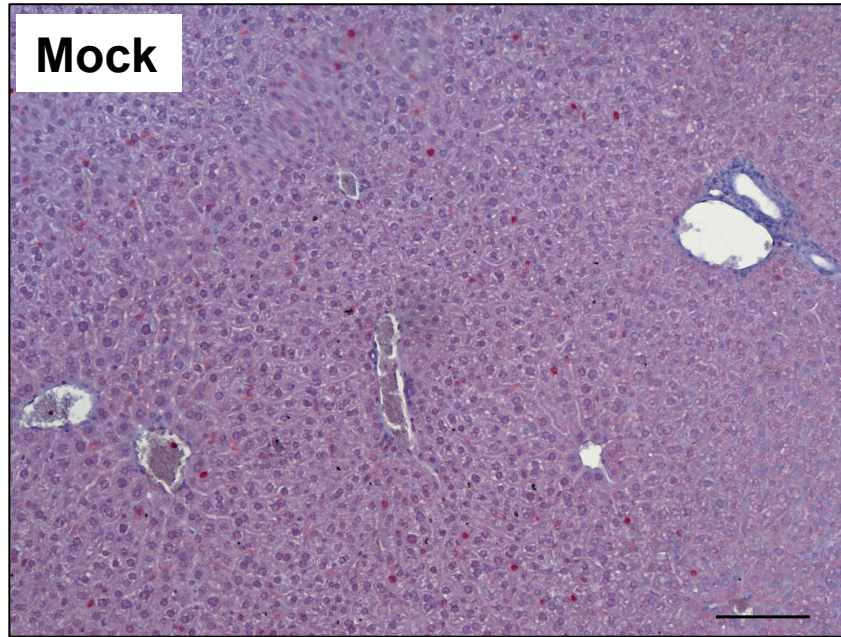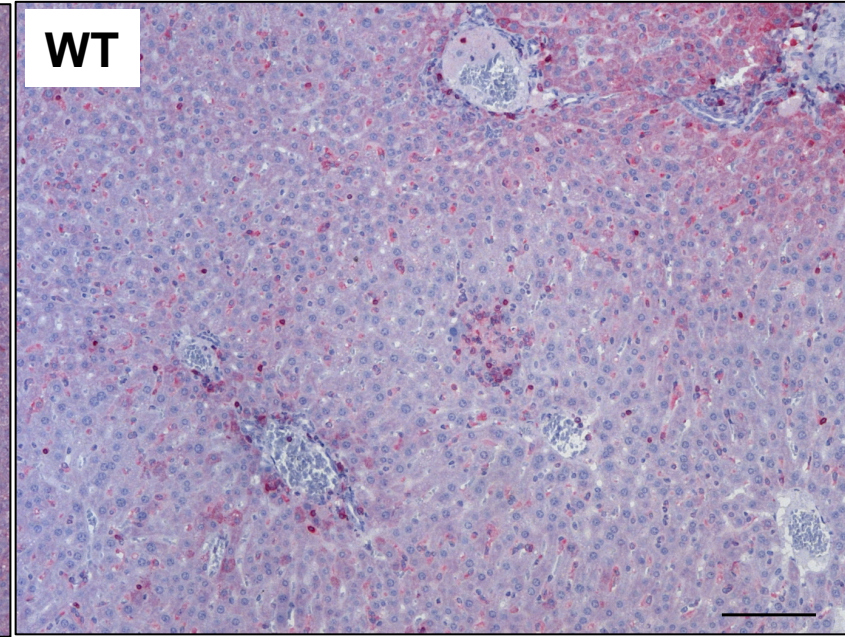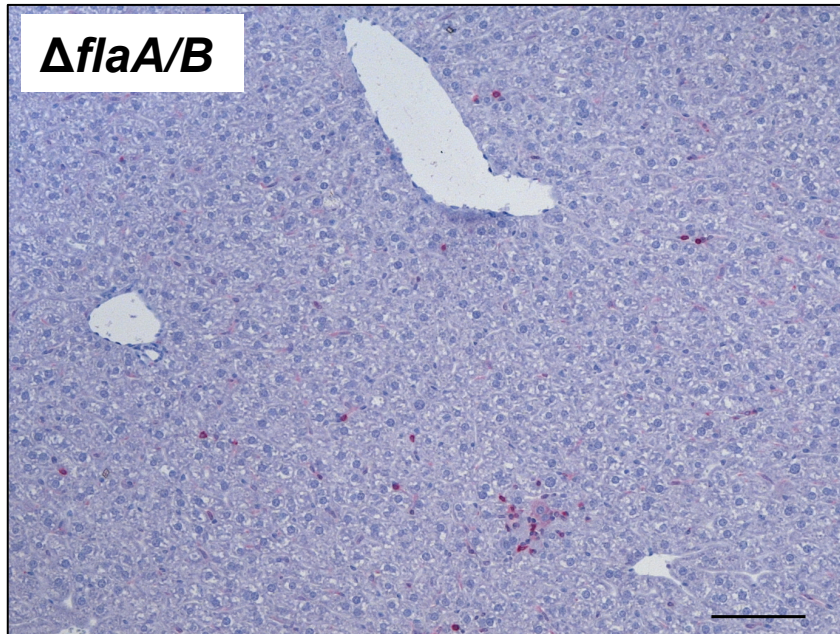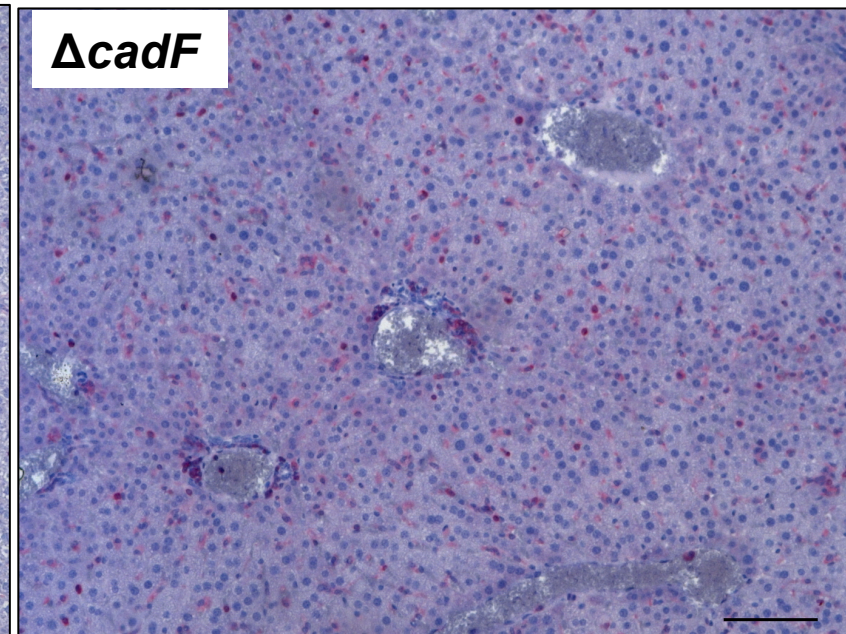

**G**

# T Lymphocytes (CD3+) - KIDNEY

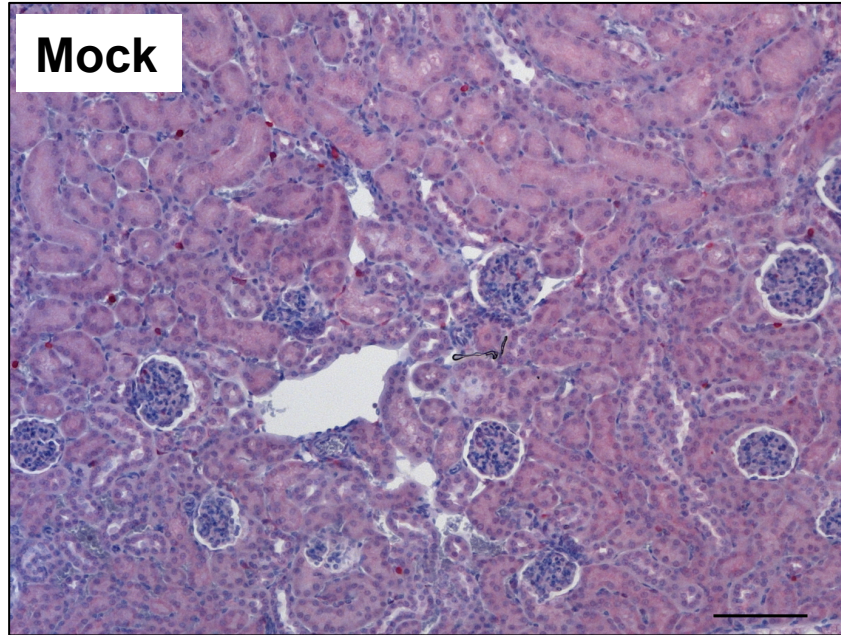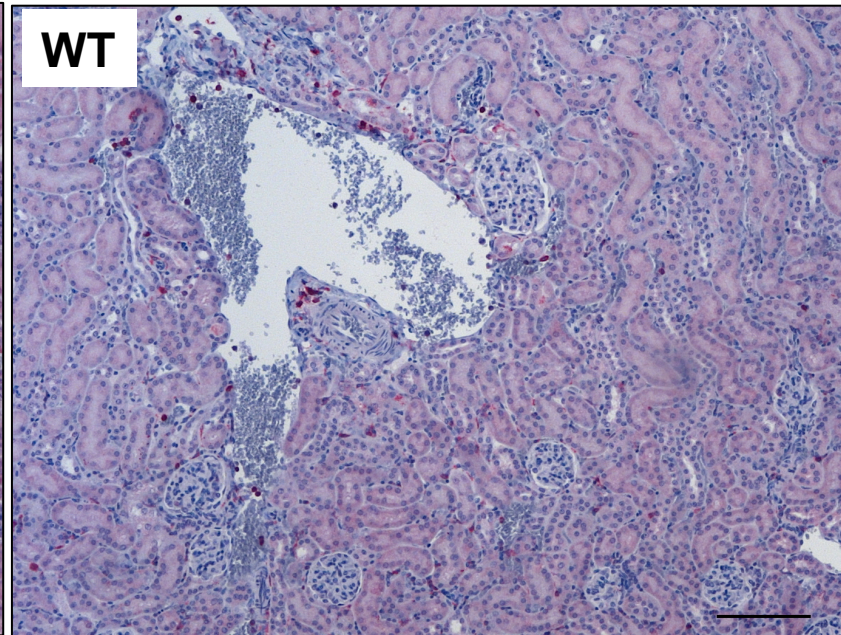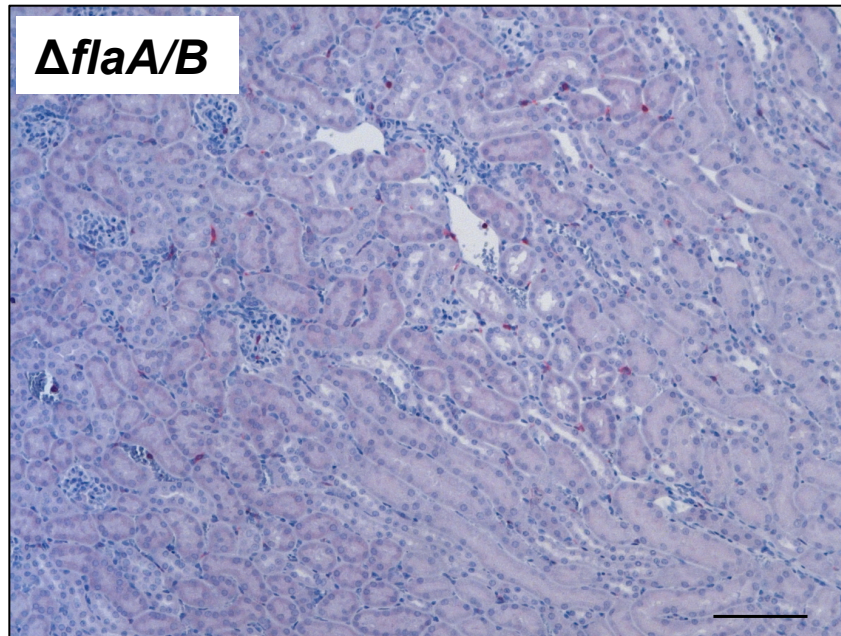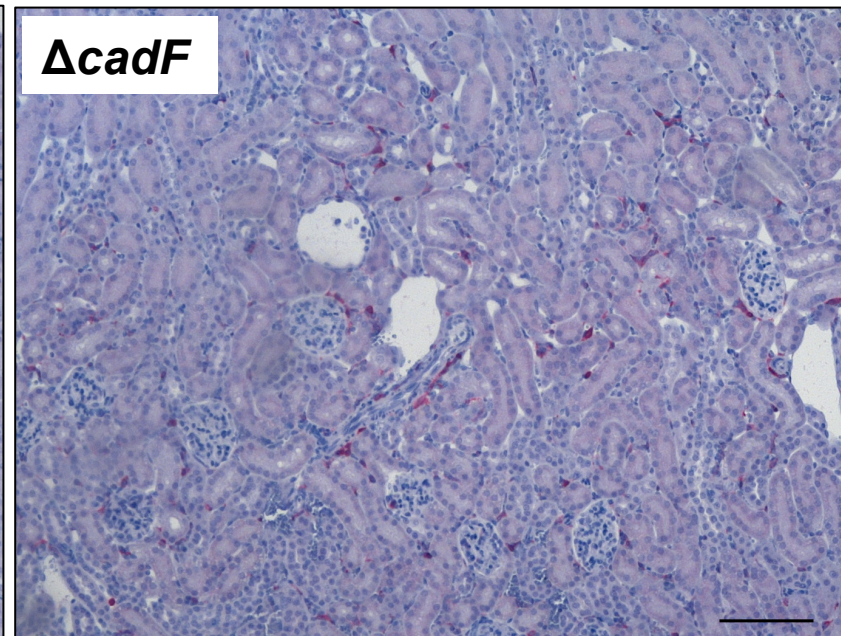

Supplement: 13099_2019_306_MOESM1_ESM.pdf [file 13099_2019_306_MOESM1_ESM.pdf]
